# Supplementary material for: Geographic Differences in Genetic Susceptibility to IgA Nephropathy: GWAS Replication Study and Geospatial Risk Analysis
Source: PubMed Central journal article supplement (PMC3380840; doi:10.1371/journal.pgen.1002765), 2012-06-21

Supplemental Figure 2. Inter-continental differences in the genetic risk score based on 85 worldwide populations used for geospatial analysis.

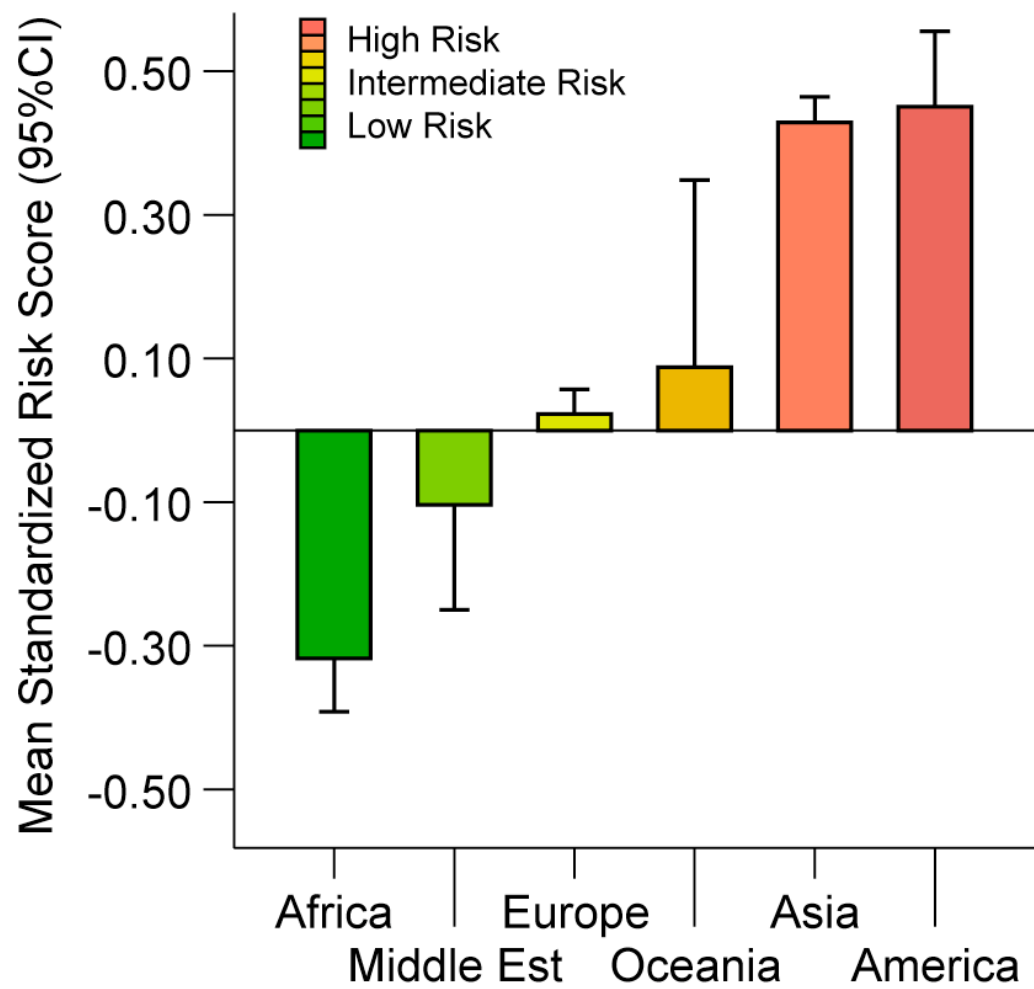

Supplement: pgen.1002765.s002.pdf [file pgen.1002765.s002.pdf]
