# Supplementary material for: Geographic Differences in Genetic Susceptibility to IgA Nephropathy: GWAS Replication Study and Geospatial Risk Analysis
Source: PubMed Central journal article supplement (PMC3380840; doi:10.1371/journal.pgen.1002765), 2012-06-21

**Supplemental Figure 3. Geospatial risk model for native populations.** Surface interpolation of the standardized risk score for HGDP (circles) and HapMap-III (diamonds) datasets. The risk increases globally with the distance from the prime meridian (Pearson's  $r = 0.31$ ,  $p < 2.2 \times 10^{-16}$ ) and northward within Europe (Pearson's  $r = 0.13$ ,  $p = 6.6 \times 10^{-4}$ ).

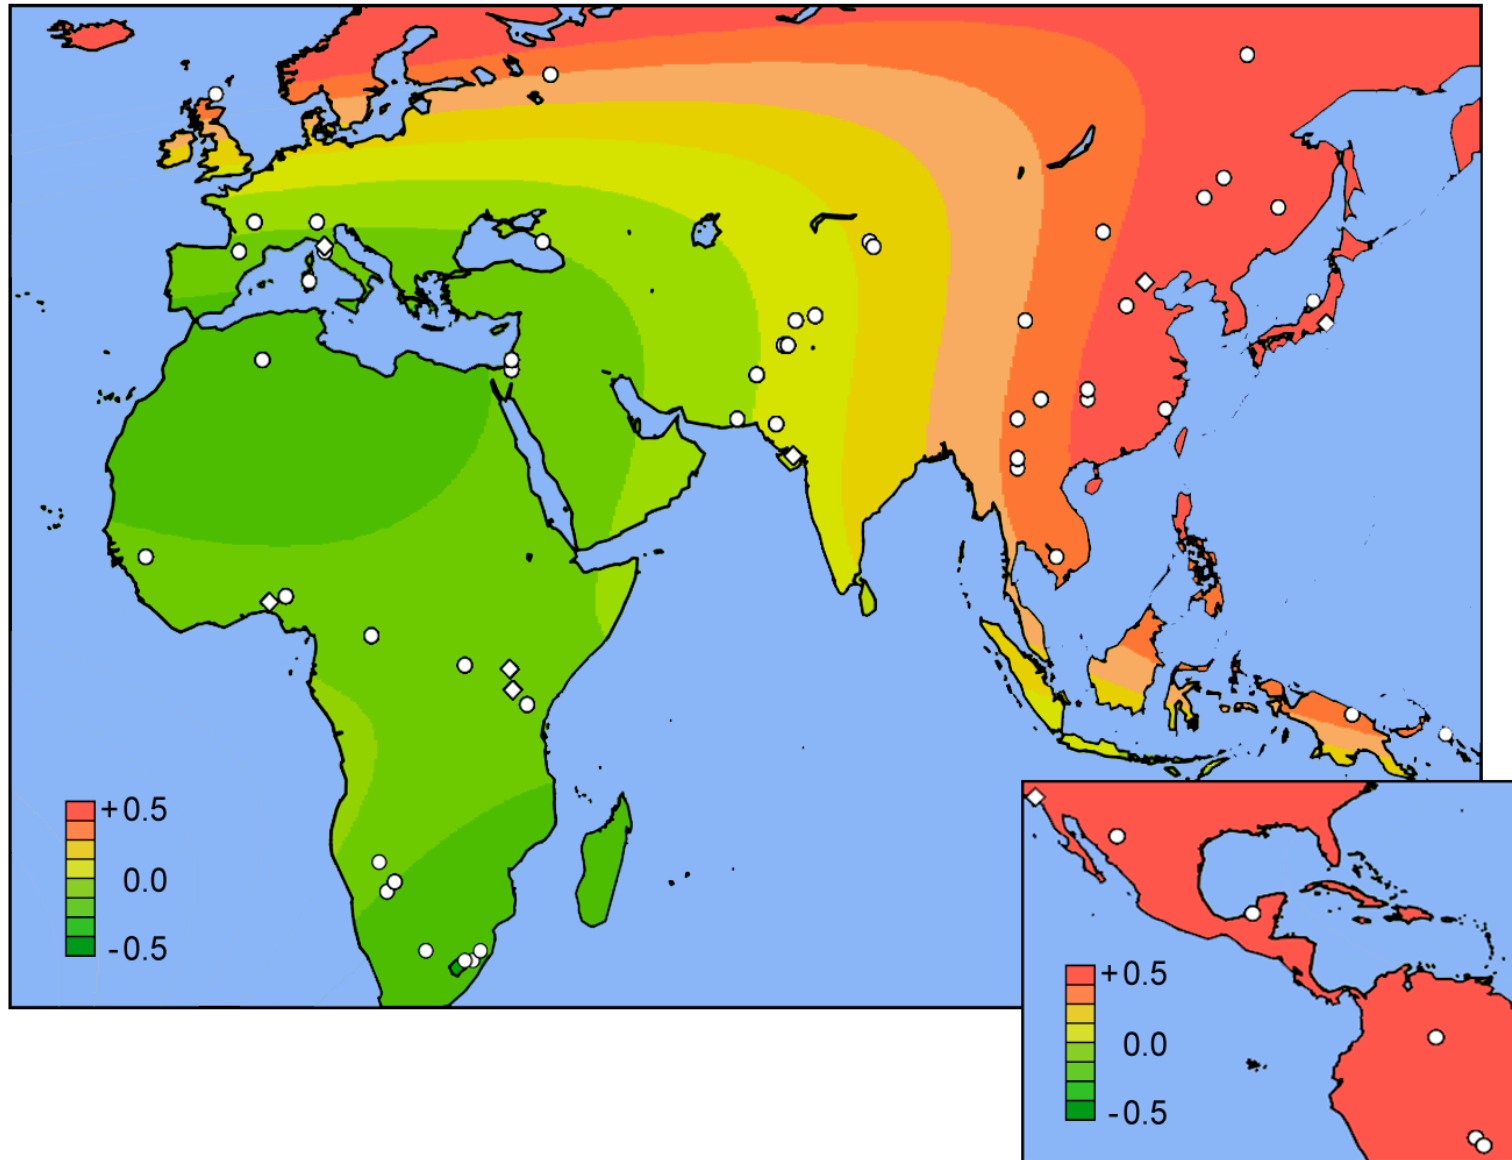

Supplement: pgen.1002765.s003.pdf [file pgen.1002765.s003.pdf]
