# Supplementary material for: Geographic Differences in Genetic Susceptibility to IgA Nephropathy: GWAS Replication Study and Geospatial Risk Analysis
Source: PubMed Central journal article supplement (PMC3380840; doi:10.1371/journal.pgen.1002765), 2012-06-21
Supplement: pgen.1002765.s004.pdf [file pgen.1002765.s004.pdf]

**Supplemental Table 1. Summary of the case-control replication cohorts before and after quality control measures.**

| Cohorts by Nationality:   | Genotyped    |                      | After QC     |                      | Average Genotype Call Rate <sup>#</sup> |
|---------------------------|--------------|----------------------|--------------|----------------------|-----------------------------------------|
|                           | Total        | Cases / Controls     | Total        | Cases / Controls     |                                         |
| Italian Cohort *          | 1,165        | 491 / 674            | 1,116        | 478 / 638            | 98.4%                                   |
| French Cohort **          | 899          | 496 / 403            | 895          | 493 / 402            | 99.2%                                   |
| German Cohort ***         | 624          | 251 / 373            | 621          | 249 / 372            | 98.8%                                   |
| Czech Cohort              | 468          | 245 / 223            | 465          | 244 / 221            | 97.8%                                   |
| Hungarian Cohort          | 444          | 139 / 305            | 431          | 138 / 293            | 98.4%                                   |
| Han Chinese Cohort        | 622          | 333 / 289            | 617          | 333 / 284            | 95.7%                                   |
| Japanese Cohort           | 558          | 264 / 294            | 550          | 259 / 291            | 98.4%                                   |
| African-American Cohort   | 94           | 34 / 60              | 94           | 34 / 60              | 98.9%                                   |
| <b>All Cohorts Total:</b> | <b>4,874</b> | <b>2,253 / 2,621</b> | <b>4,789</b> | <b>2,228 / 2,561</b> | <b>98.2%</b>                            |

\* The Italian Cohort is composed of two sub-cohorts: the North Italian (410 cases and 524 controls) and the South Italian (81 cases and 150 controls).

\*\* The French Cohort is composed of two sub-cohorts: the St.Etienne (289 cases and 244 controls) and the GN-Progress (207 cases and 159 controls).

\*\*\* The German Cohort is composed of two sub-cohorts: the Stop-IGAN (150 cases and 293 controls) and the Hamburg-Eppendorf (101 cases and 80 controls).

# For combined datasets, the genotyping call rate represents a weighted average of the genotyping rates (weights based on cohort size).
