# Supplementary material for: Geographic Differences in Genetic Susceptibility to IgA Nephropathy: GWAS Replication Study and Geospatial Risk Analysis
Source: PubMed Central journal article supplement (PMC3380840; doi:10.1371/journal.pgen.1002765), 2012-06-21
Supplement: pgen.1002765.s006.pdf [file pgen.1002765.s006.pdf]

Supplemental Table 3. Case-control association results for the individual replication cohorts.

| Chr | Loc (kb) | SNP (minor allele)   | Italian Cohort<br>N = 1,116<br>(478 cases / 638 controls) |                      | French Cohort<br>N = 895<br>(493 cases / 402 controls) |                      | German Cohort<br>N = 621<br>(249 cases / 372 controls) |                      | Czech Cohort<br>N = 465<br>(244 cases / 221 controls) |                      | Hungarian Cohort<br>N = 431<br>(138 cases / 293 controls) |                      | Chinese Cohort<br>N = 617<br>(333 cases / 284 controls) |                      | Japanese Cohort<br>N = 550<br>(259 cases / 291 controls) |                      | African-American Cohort<br>N = 94<br>(34 cases / 60 controls) |                      |
|-----|----------|----------------------|-----------------------------------------------------------|----------------------|--------------------------------------------------------|----------------------|--------------------------------------------------------|----------------------|-------------------------------------------------------|----------------------|-----------------------------------------------------------|----------------------|---------------------------------------------------------|----------------------|----------------------------------------------------------|----------------------|---------------------------------------------------------------|----------------------|
|     |          |                      | OR                                                        | P-value              | OR                                                     | P-value              | OR                                                     | P-value              | OR                                                    | P-value              | OR                                                        | P-value              | OR                                                      | P-value              | OR                                                       | P-value              | OR                                                            | P-value              |
| 1   | 194,918  | <b>rs3766404 (C)</b> | 0.85                                                      | $2.0 \times 10^{-1}$ | 0.72                                                   | $6.4 \times 10^{-2}$ | 0.71                                                   | $3.8 \times 10^{-2}$ | 1.01                                                  | $9.5 \times 10^{-1}$ | 0.79                                                      | $2.7 \times 10^{-1}$ | 0.68                                                    | $7.7 \times 10^{-2}$ | 0.72                                                     | $1.8 \times 10^{-1}$ | 0.60                                                          | $1.2 \times 10^{-1}$ |
| 1   | 194,953  | <b>rs6677604 (A)</b> | 0.88                                                      | $2.2 \times 10^{-1}$ | 0.70                                                   | $4.3 \times 10^{-3}$ | 0.74                                                   | $3.5 \times 10^{-2}$ | 1.02                                                  | $9.2 \times 10^{-1}$ | 0.73                                                      | $9.4 \times 10^{-2}$ | 0.66                                                    | $8.6 \times 10^{-2}$ | 0.71                                                     | $2.6 \times 10^{-1}$ | 0.59                                                          | $1.1 \times 10^{-1}$ |
| 6   | 32,768   | <b>rs9275224 (A)</b> | 0.78                                                      | $6.4 \times 10^{-3}$ | 0.76                                                   | $4.7 \times 10^{-3}$ | 0.71                                                   | $4.4 \times 10^{-3}$ | 0.84                                                  | $2.3 \times 10^{-1}$ | 0.60                                                      | $9.5 \times 10^{-4}$ | 0.80                                                    | $6.2 \times 10^{-2}$ | 0.74                                                     | $1.8 \times 10^{-2}$ | 0.60                                                          | $1.1 \times 10^{-1}$ |
| 6   | 32,778   | <b>rs2856717 (T)</b> | 0.91                                                      | $3.5 \times 10^{-1}$ | 0.89                                                   | $2.7 \times 10^{-1}$ | 0.87                                                   | $2.6 \times 10^{-1}$ | 0.89                                                  | $3.6 \times 10^{-1}$ | 0.65                                                      | $6.7 \times 10^{-3}$ | 0.94                                                    | $6.5 \times 10^{-1}$ | 0.76                                                     | $9.7 \times 10^{-2}$ | 0.71                                                          | $3.5 \times 10^{-1}$ |
| 6   | 32,779   | <b>rs9275424 (G)</b> | 0.99                                                      | $9.6 \times 10^{-1}$ | 1.36                                                   | $6.0 \times 10^{-3}$ | 1.20                                                   | $1.8 \times 10^{-1}$ | 1.21                                                  | $2.5 \times 10^{-1}$ | 1.37                                                      | $9.6 \times 10^{-2}$ | 1.14                                                    | $4.1 \times 10^{-1}$ | 1.47                                                     | $2.6 \times 10^{-3}$ | 0.82                                                          | $5.6 \times 10^{-1}$ |
| 6   | 32,789   | <b>rs9275596 (C)</b> | 0.78                                                      | $2.1 \times 10^{-2}$ | 0.82                                                   | $6.5 \times 10^{-2}$ | 0.82                                                   | $1.2 \times 10^{-1}$ | 0.73                                                  | $6.7 \times 10^{-2}$ | 0.58                                                      | $1.2 \times 10^{-3}$ | 0.70                                                    | $1.5 \times 10^{-2}$ | 0.66                                                     | $3.9 \times 10^{-2}$ | 0.78                                                          | $4.8 \times 10^{-1}$ |
| 6   | 32,917   | <b>rs9357155 (A)</b> | 0.76                                                      | $5.9 \times 10^{-2}$ | 1.23                                                   | $1.6 \times 10^{-1}$ | 0.71                                                   | $6.0 \times 10^{-2}$ | 0.79                                                  | $2.4 \times 10^{-1}$ | 1.59                                                      | $5.4 \times 10^{-2}$ | 1.23                                                    | $1.9 \times 10^{-1}$ | 0.83                                                     | $3.2 \times 10^{-1}$ | 1.56                                                          | $4.2 \times 10^{-1}$ |
| 6   | 32,919   | <b>rs2071543 (A)</b> | 0.82                                                      | $1.6 \times 10^{-1}$ | 1.11                                                   | $4.7 \times 10^{-1}$ | 0.67                                                   | $2.8 \times 10^{-2}$ | 0.71                                                  | $1.1 \times 10^{-1}$ | 1.58                                                      | $5.3 \times 10^{-2}$ | 1.17                                                    | $5.1 \times 10^{-1}$ | 0.80                                                     | $2.1 \times 10^{-1}$ | 1.26                                                          | $6.0 \times 10^{-1}$ |
| 6   | 33,194   | <b>rs1883414 (T)</b> | 0.90                                                      | $2.6 \times 10^{-1}$ | 0.84                                                   | $8.1 \times 10^{-2}$ | 1.00                                                   | $9.9 \times 10^{-1}$ | 0.80                                                  | $1.2 \times 10^{-1}$ | 0.90                                                      | $5.1 \times 10^{-1}$ | 0.83                                                    | $1.8 \times 10^{-1}$ | 0.84                                                     | $2.5 \times 10^{-1}$ | 0.70                                                          | $3.9 \times 10^{-1}$ |
| 6   | 33,205   | <b>rs3129269 (T)</b> | 0.94                                                      | $4.9 \times 10^{-1}$ | 0.92                                                   | $4.1 \times 10^{-1}$ | 1.01                                                   | $9.5 \times 10^{-1}$ | 0.76                                                  | $5.7 \times 10^{-2}$ | 0.96                                                      | $7.9 \times 10^{-1}$ | 0.82                                                    | $1.5 \times 10^{-1}$ | 0.74                                                     | $7.2 \times 10^{-2}$ | 0.74                                                          | $4.4 \times 10^{-1}$ |
| 22  | 28,824   | <b>rs2412971 (A)</b> | 0.85                                                      | $6.7 \times 10^{-2}$ | 0.81                                                   | $2.2 \times 10^{-2}$ | 0.86                                                   | $1.8 \times 10^{-1}$ | 0.92                                                  | $5.1 \times 10^{-1}$ | 0.97                                                      | $8.4 \times 10^{-1}$ | 0.72                                                    | $9.5 \times 10^{-3}$ | 0.57                                                     | $1.7 \times 10^{-4}$ | 0.62                                                          | $1.3 \times 10^{-1}$ |
| 22  | 28,859   | <b>rs2412973 (A)</b> | 0.85                                                      | $5.8 \times 10^{-2}$ | 0.79                                                   | $1.4 \times 10^{-2}$ | 0.86                                                   | $1.7 \times 10^{-1}$ | 0.93                                                  | $5.5 \times 10^{-1}$ | 0.98                                                      | $8.9 \times 10^{-1}$ | 0.72                                                    | $9.8 \times 10^{-3}$ | 0.57                                                     | $1.3 \times 10^{-4}$ | 0.62                                                          | $1.3 \times 10^{-1}$ |
