# Supplementary material for: Geographic Differences in Genetic Susceptibility to IgA Nephropathy: GWAS Replication Study and Geospatial Risk Analysis
Source: PubMed Central journal article supplement (PMC3380840; doi:10.1371/journal.pgen.1002765), 2012-06-21
Supplement: pgen.1002765.s007.pdf [file pgen.1002765.s007.pdf]

**Supplemental Table 4. Pairwise LD between the SNPs of the HLA region:  $r^2$  (top right half) and  $D'$  (bottom left half) for all cohorts (top), Europeans (middle) and Asians (bottom).**

**All cohorts: N = 10,755**

| $D'$ \ $r^2$ | rs9275224 | rs2856717 | rs9275424 | rs9275596 | rs9357155 | rs1883414 |
|--------------|-----------|-----------|-----------|-----------|-----------|-----------|
| rs9275224    |           | 0.543     | 0.212     | 0.387     | 0.000     | 0.014     |
| rs2856717    | 0.998     |           | 0.117     | 0.715     | 0.004     | 0.001     |
| rs9275424    | 0.997     | 0.997     |           | 0.091     | 0.000     | 0.003     |
| rs9275596    | 0.946     | 0.947     | 0.993     |           | 0.002     | 0.001     |
| rs9357155    | 0.049     | 0.101     | 0.013     | 0.066     |           | 0.001     |
| rs1883414    | 0.159     | 0.030     | 0.163     | 0.039     | 0.108     |           |

**European Cohorts: N=5,938**

| $D'$ \ $r^2$ | rs9275224 | rs2856717 | rs9275424 | rs9275596 | rs9357155 | rs1883414 |
|--------------|-----------|-----------|-----------|-----------|-----------|-----------|
| rs9275224    |           | 0.623     | 0.205     | 0.451     | 0.005     | 0.000     |
| rs2856717    | 0.998     |           | 0.130     | 0.715     | 0.000     | 0.002     |
| rs9275424    | 0.997     | 0.998     |           | 0.104     | 0.007     | 0.000     |
| rs9275596    | 0.943     | 0.938     | 0.994     |           | 0.002     | 0.002     |
| rs9357155    | 0.229     | 0.041     | 0.127     | 0.206     |           | 0.003     |
| rs1883414    | 0.028     | 0.093     | 0.029     | 0.115     | 0.101     |           |

**Asian Cohorts: N=4,723**

| $D'$ \ $r^2$ | rs9275224 | rs2856717 | rs9275424 | rs9275596 | rs9357155 | rs1883414 |
|--------------|-----------|-----------|-----------|-----------|-----------|-----------|
| rs9275224    |           | 0.437     | 0.217     | 0.300     | 0.003     | 0.050     |
| rs2856717    | 0.997     |           | 0.096     | 0.699     | 0.037     | 0.004     |
| rs9275424    | 0.998     | 1.000     |           | 0.072     | 0.010     | 0.008     |
| rs9275596    | 0.950     | 0.959     | 0.995     |           | 0.039     | 0.008     |
| rs9357155    | 0.102     | 0.224     | 0.381     | 0.200     |           | 0.007     |
| rs1883414    | 0.343     | 0.065     | 0.286     | 0.105     | 0.381     |           |
