# Supplementary material for: Geographic Differences in Genetic Susceptibility to IgA Nephropathy: GWAS Replication Study and Geospatial Risk Analysis
Source: PubMed Central journal article supplement (PMC3380840; doi:10.1371/journal.pgen.1002765), 2012-06-21
Supplement: pgen.1002765.s008.pdf [file pgen.1002765.s008.pdf]

**Supplemental Table 5. Haplotype analysis of rs9275224, rs2856717, rs9275424, and rs9275596 at the *HLA-DQB1/DRB1* locus.** The most common haplotype of 4 major alleles (GCAT) is used as a reference to derive odds ratios for all other haplotypes. Only common haplotypes (frequency >1%) are tested for association.

**All Cohorts: N = 10,755**

|             | <b>Freq. Overall</b> | <b>Freq. Cases</b> | <b>Freq. Controls</b> | <b>OR</b>   | <b>95%CI</b> | <b>P-global</b>       |
|-------------|----------------------|--------------------|-----------------------|-------------|--------------|-----------------------|
| <b>GCAT</b> | 0.352                | 0.365              | 0.338                 | -reference- | -reference-  |                       |
| <b>ATAC</b> | 0.213                | 0.180              | 0.245                 | 0.69        | 0.64 - 0.74  |                       |
| <b>ACAT</b> | 0.130                | 0.119              | 0.141                 | 0.78        | 0.71 - 0.85  | 3 x 10 <sup>-43</sup> |
| <b>ATAT</b> | 0.050                | 0.058              | 0.043                 | 1.25        | 1.10 - 1.42  |                       |
| <b>GCGT</b> | 0.246                | 0.270              | 0.222                 | 1.12        | 1.04 - 1.20  |                       |

**European Cohorts: N = 5,938**

|             | <b>Freq. Overall</b> | <b>Freq. Cases</b> | <b>Freq. Controls</b> | <b>OR</b>   | <b>95%CI</b> | <b>P-global</b>       |
|-------------|----------------------|--------------------|-----------------------|-------------|--------------|-----------------------|
| <b>GCAT</b> | 0.350                | 0.365              | 0.336                 | -reference- | -reference-  |                       |
| <b>ATAC</b> | 0.256                | 0.228              | 0.282                 | 0.75        | 0.68 - 0.82  |                       |
| <b>ACAT</b> | 0.104                | 0.090              | 0.117                 | 0.71        | 0.62 - 0.81  | 3 x 10 <sup>-18</sup> |
| <b>ATAT</b> | 0.054                | 0.062              | 0.047                 | 1.21        | 1.02 - 1.43  |                       |
| <b>GCGT</b> | 0.224                | 0.244              | 0.205                 | 1.09        | 0.99 - 1.20  |                       |

**Asian Cohorts: N = 4,723**

|             | <b>Freq. Overall</b> | <b>Freq. Cases</b> | <b>Freq. Controls</b> | <b>OR</b>   | <b>95%CI</b> | <b>P-global</b>       |
|-------------|----------------------|--------------------|-----------------------|-------------|--------------|-----------------------|
| <b>GCAT</b> | 0.356                | 0.366              | 0.345                 | -reference- | -reference-  |                       |
| <b>ATAC</b> | 0.156                | 0.124              | 0.191                 | 0.61        | 0.54 - 0.69  |                       |
| <b>ACAT</b> | 0.163                | 0.152              | 0.175                 | 0.81        | 0.72 - 0.92  | 4 x 10 <sup>-24</sup> |
| <b>ATAT</b> | 0.046                | 0.053              | 0.038                 | 1.34        | 1.09 - 1.65  |                       |
| <b>GCGT</b> | 0.274                | 0.299              | 0.245                 | 1.15        | 1.04 - 1.27  |                       |
