# Supplementary material for: Geographic Differences in Genetic Susceptibility to IgA Nephropathy: GWAS Replication Study and Geospatial Risk Analysis
Source: PubMed Central journal article supplement (PMC3380840; doi:10.1371/journal.pgen.1002765), 2012-06-21
Supplement: pgen.1002765.s010.pdf [file pgen.1002765.s010.pdf]

**Supplemental Table 7. The comparison of the original and the newly refined genetic risk score.**

| Cohort                         | N <sup>#</sup> | Original Risk Score |                         |                           |                               | Newly Refined Risk Score |                         |                           |                               |
|--------------------------------|----------------|---------------------|-------------------------|---------------------------|-------------------------------|--------------------------|-------------------------|---------------------------|-------------------------------|
|                                |                | R <sup>2*</sup>     | C (95%CI) <sup>**</sup> | OR (95%CI) <sup>***</sup> | P-value <sup>****</sup>       | R <sup>2*</sup>          | C (95%CI) <sup>**</sup> | OR (95%CI) <sup>***</sup> | P-value <sup>****</sup>       |
| Italian Cohort                 | 1,005          | 2.0%                | 0.57 (0.53-0.60)        | 1.30 (1.14-1.49)          | 1.5 x 10 <sup>-4</sup>        | 3.4%                     | 0.59 (0.56-0.63)        | 1.43 (1.24-1.64)          | 6.8 x 10 <sup>-7</sup>        |
| French Cohort                  | 859            | 1.8%                | 0.57 (0.53-0.61)        | 1.27 (1.10-1.45)          | 7.6 x 10 <sup>-4</sup>        | 2.8%                     | 0.58 (0.55-0.62)        | 1.36 (1.18-1.57)          | 2.6 x 10 <sup>-5</sup>        |
| German Cohort                  | 571            | 2.3%                | 0.58 (0.53-0.63)        | 1.35 (1.12-1.62)          | 1.9 x 10 <sup>-3</sup>        | 4.4%                     | 0.60 (0.56-0.65)        | 1.54 (1.26-1.88)          | 2.0 x 10 <sup>-5</sup>        |
| Czech Cohort                   | 402            | 1.7%                | 0.57 (0.51-0.63)        | 1.23 (1.03-1.46)          | 2.4 x 10 <sup>-2</sup>        | 2.0%                     | 0.57 (0.52-0.63)        | 1.23 (1.04-1.45)          | 1.5 x 10 <sup>-2</sup>        |
| Hungarian Cohort               | 393            | 2.8%                | 0.59 (0.53-0.65)        | 1.40 (1.10-1.79)          | 5.7 x 10 <sup>-3</sup>        | 4.4%                     | 0.61 (0.55-0.67)        | 1.54 (1.21-1.96)          | 5.1 x 10 <sup>-4</sup>        |
| Chinese Cohort                 | 595            | 1.6%                | 0.57 (0.52-0.62)        | 1.29 (1.07-1.57)          | 8.0 x 10 <sup>-3</sup>        | 2.7%                     | 0.59 (0.54-0.63)        | 1.36 (1.14-1.62)          | 6.2 x 10 <sup>-4</sup>        |
| Japanese Cohort                | 512            | 2.7%                | 0.59 (0.54-0.64)        | 1.34 (1.12-1.60)          | 1.5 x 10 <sup>-3</sup>        | 4.0%                     | 0.61 (0.56-0.65)        | 1.38 (1.17-1.62)          | 1.2 x 10 <sup>-4</sup>        |
| African-American Cohort        | 85             | 4.6%                | 0.63 (0.50-0.76)        | 1.50 (0.93-2.41)          | 9.6 x 10 <sup>-2</sup>        | 5.1%                     | 0.64 (0.51-0.77)        | 1.63 (0.94-2.82)          | 8.1 x 10 <sup>-2</sup>        |
| <b>All Replication Cohorts</b> | <b>4,422</b>   | <b>2.2%</b>         | <b>0.58 (0.56-0.59)</b> | <b>1.29 (1.22-1.37)</b>   | <b>5.4 x 10<sup>-17</sup></b> | <b>3.2%</b>              | <b>0.59 (0.57-0.61)</b> | <b>1.36 (1.28-1.45)</b>   | <b>3.3 x 10<sup>-24</sup></b> |
| GWAS Discovery                 | 2,091          | 7.0%                | 0.63 (0.60-0.65)        | 1.70 (1.54-1.88)          | 1.9 x 10 <sup>-24</sup>       | 7.6%                     | 0.64 (0.61-0.66)        | 1.69 (1.54-1.86)          | 1.5 x 10 <sup>-26</sup>       |
| GWAS Asian Follow-up           | 1,384          | 5.3%                | 0.61 (0.58-0.64)        | 1.65 (1.44-1.89)          | 5.8 x 10 <sup>-13</sup>       | 5.0%                     | 0.61 (0.58-0.64)        | 1.57 (1.39-1.78)          | 1.2 x 10 <sup>-12</sup>       |
| GWAS European Follow-up        | 2,156          | 4.3%                | 0.60 (0.58-0.63)        | 1.46 (1.34-1.60)          | 1.6 x 10 <sup>-16</sup>       | 5.3%                     | 0.61 (0.59-0.64)        | 1.56 (1.42-1.71)          | 1.0 x 10 <sup>-19</sup>       |
| <b>All GWAS Cohorts</b>        | <b>5,631</b>   | <b>5.0%</b>         | <b>0.61 (0.60-0.62)</b> | <b>1.51(1.43-1.60)</b>    | <b>3.1 x 10<sup>-46</sup></b> | <b>5.7%</b>              | <b>0.62 (0.60-0.63)</b> | <b>1.56 (1.47-1.65)</b>   | <b>4.1 x 10<sup>-52</sup></b> |
| All Asian Cohorts Combined     | 4,582          | 4.5%                | 0.60 (0.59-0.62)        | 1.53 (1.43-1.64)          | 3.0 x 10 <sup>-34</sup>       | 5.0%                     | 0.61 (0.59-0.63)        | 1.52 (1.43-1.62)          | 2.6 x 10 <sup>-38</sup>       |
| All European Cohorts Combined  | 5,386          | 2.6%                | 0.58 (0.57-0.60)        | 1.34 (1.26-1.41)          | 3.7 x 10 <sup>-24</sup>       | 3.6%                     | 0.59 (0.58-0.61)        | 1.42 (1.34-1.51)          | 6.7 x 10 <sup>-33</sup>       |
| <b>All Cohorts Combined</b>    | <b>10,053</b>  | <b>3.8%</b>         | <b>0.60 (0.59-0.61)</b> | <b>1.42 (1.36-1.50)</b>   | <b>6.2 x 10<sup>-63</sup></b> | <b>4.7%</b>              | <b>0.61 (0.60-0.62)</b> | <b>1.47 (1.42-1.54)</b>   | <b>1.2 x 10<sup>-76</sup></b> |

<sup>#</sup> Number of analyzed individuals with 100% non-missing genotypes across all 7 scored loci.

\* R<sup>2</sup>: Nagelkerke R square expressed as percent

\*\* C-statistic: area under the ROC curve and its 95% confidence interval.

\*\*\* odds ratio per one standard deviation of the standardized risk score and its 95% confidence interval.

\*\*\*\* Wald's test for risk score as a quantitative predictor of disease status.
