# Supplementary material for: Geographic Differences in Genetic Susceptibility to IgA Nephropathy: GWAS Replication Study and Geospatial Risk Analysis
Source: PubMed Central journal article supplement (PMC3380840; doi:10.1371/journal.pgen.1002765), 2012-06-21
Supplement: pgen.1002765.s011.pdf [file pgen.1002765.s011.pdf]

**Supplemental Table 8. African, Middle Eastern, and European populations included in the geospatial risk analysis.** The populations were grouped by their continental origin and sorted based on the median genetic risk score.

| Continental Group | Country/Region           | Population/Site           | Sample Source | Sample Size | Longitude | Latitude | Median Standardized Risk Score |
|-------------------|--------------------------|---------------------------|---------------|-------------|-----------|----------|--------------------------------|
| Africa            | Central African Republic | Biaka Pygmies             | HGDP          | 32          | 17.0      | 4.0      | -0.77                          |
| Africa            | Algeria                  | Mزاب                      | HGDP          | 30          | 3.0       | 32.0     | -0.64                          |
| Africa            | South Africa             | Bantu                     | HGDP          | 8           | 25.2      | -25.8    | -0.62                          |
| Africa            | Namibia                  | San                       | HGDP          | 6           | 20.0      | -21.0    | -0.55                          |
| Africa            | Nigeria                  | Yoruba                    | HGDP          | 24          | 6.0       | 8.0      | -0.41                          |
| Africa            | Nigeria                  | YRI                       | HAPMAP3       | 112         | 3.9       | 7.4      | -0.39                          |
| Africa            | Senegal                  | Mandenka                  | HGDP          | 24          | -12.0     | 12.0     | -0.29                          |
| Africa            | Congo                    | Mbuti Pygmies             | HGDP          | 15          | 29.0      | 1.0      | -0.27                          |
| Africa            | Kenya Kinyawa            | MKK                       | HAPMAP3       | 140         | 35.2      | -1.5     | -0.25                          |
| Africa            | Kenya Webuye             | LWK                       | HAPMAP3       | 89          | 34.8      | 0.6      | -0.14                          |
| Africa            | Kenya                    | Bantu                     | HGDP          | 12          | 37.0      | -3.0     | 0.13                           |
| Middle East       | Israel Negev             | Bedouin                   | HGDP          | 48          | 35.0      | 31.0     | -0.60                          |
| Middle East       | Israel Central           | Palestinian               | HGDP          | 51          | 35.0      | 32.0     | -0.13                          |
| Middle East       | Lebanon Beirut           | Arab                      | Present Study | 29          | 35.5      | 33.9     | 0.12                           |
| Middle East       | Israel Carmel            | Druze                     | HGDP          | 46          | 35.0      | 32.0     | 0.31                           |
| Europe            | North Italy              | Italian, Bergamo          | HGDP          | 13          | 10.0      | 46.0     | -0.33                          |
| Europe            | Sardinia                 | Sardinian                 | HGDP          | 28          | 9.0       | 40.0     | -0.33                          |
| Europe            | Russia Caucasus          | Adygei                    | HGDP          | 17          | 39.0      | 44.0     | -0.33                          |
| Europe            | Czech Republic           | Czech, Prague             | Present Study | 187         | 14.5      | 50.1     | -0.27                          |
| Europe            | North Italy              | Italian, Lecco            | IgAN GWAS     | 24          | 9.4       | 45.9     | -0.26                          |
| Europe            | North Italy              | Italian, Firenze          | HGDP          | 8           | 11.0      | 43.0     | -0.18                          |
| Europe            | France                   | French, St.Etienne        | Present Study | 230         | 1.2       | 43.6     | -0.16                          |
| Europe            | France                   | French, Basque            | HGDP          | 24          | 0.0       | 43.0     | -0.12                          |
| Europe            | North Italy              | Italian, Trento           | Present Study | 27          | 11.1      | 46.1     | -0.12                          |
| Europe            | North Italy              | Italian, TSI              | HAPMAP3       | 86          | 11.0      | 43.6     | -0.09                          |
| Europe            | France                   | French                    | HGDP          | 29          | 2.0       | 46.0     | -0.08                          |
| Europe            | Germany                  | German, Hamburg-Eppendorf | Present Study | 74          | 10.0      | 53.6     | 0.00                           |
| Europe            | North Italy              | Italian, Firenze          | Present Study | 34          | 11.0      | 43.0     | 0.01                           |
| Europe            | Germany                  | German, Aachen            | Present Study | 268         | 6.1       | 50.8     | 0.03                           |
| Europe            | South Italy              | Italian, Foggia           | Present Study | 146         | 15.6      | 41.4     | 0.03                           |
| Europe            | Hungary                  | Hungarian, Pecs           | Present Study | 268         | 18.3      | 46.0     | 0.03                           |
| Europe            | North Italy              | Italian, Genoa            | Present Study | 264         | 8.9       | 44.4     | 0.10                           |
| Europe            | North Italy              | Italian, Bologna          | Present Study | 26          | 11.4      | 44.5     | 0.12                           |
| Europe            | North Italy              | Italian, Modena           | Present Study | 35          | 10.9      | 44.5     | 0.12                           |
| Europe            | North Italy              | Italian, Torino           | Present Study | 277         | 7.7       | 45.1     | 0.12                           |
| Europe            | North Italy              | Italian, Trieste          | Present Study | 89          | 13.6      | 45.9     | 0.15                           |
| Europe            | France                   | French, Paris             | Present Study | 159         | 2.2       | 48.5     | 0.16                           |
| Europe            | North Italy              | Italian, Brescia          | Present Study | 25          | 10.2      | 45.5     | 0.19                           |
| Europe            | North Italy              | Italian, Brescia          | IgAN GWAS     | 152         | 10.2      | 45.5     | 0.24                           |
| Europe            | North Italy              | Italian, Cremona          | IgAN GWAS     | 33          | 10.0      | 45.1     | 0.24                           |
| Europe            | Poland                   | Polish, Warsaw            | HyperGENES    | 94          | 21.0      | 52.2     | 0.24                           |
| Europe            | Scotland                 | Orkney Islands            | HGDP          | 16          | -3.0      | 59.0     | 0.30                           |
| Europe            | North Italy              | Italian, Valtrompia       | Present Study | 51          | 10.2      | 45.7     | 0.31                           |
| Europe            | North Western Russia     | Russian                   | HGDP          | 25          | 40.0      | 61.0     | 0.47                           |
