# Supplementary material for: Geographic Differences in Genetic Susceptibility to IgA Nephropathy: GWAS Replication Study and Geospatial Risk Analysis
Source: PubMed Central journal article supplement (PMC3380840; doi:10.1371/journal.pgen.1002765), 2012-06-21
Supplement: pgen.1002765.s013.pdf [file pgen.1002765.s013.pdf]

**Supplemental Table 10. Prevalence and Incidence of ESRD due to IgAN in Europe.** Primary data obtained from the ERA-EDTA Registry.

| Country                | Yearly Incidence (PMP) # | Population* (1000s) | ERA-EDTA Prevalence Data (December 31, 2009) |            |       |                 |              |        |
|------------------------|--------------------------|---------------------|----------------------------------------------|------------|-------|-----------------|--------------|--------|
|                        |                          |                     | Prevalent Cases (Counts)                     |            |       | IgAN Prevalence |              |        |
|                        |                          |                     | ESRD                                         | Primary GN | IgAN  | % ESRD          | % Primary GN | PMP ## |
| <b>Greece</b>          | 2.5                      | 11,283              | 12,018                                       | 2,319      | 230   | 1.9             | 9.9          | 19.6   |
| <b>Spain</b>           | 3.2                      | 35,423              | 37,349                                       | 8,142      | 1,539 | 4.1             | 18.9         | 45.5   |
| <b>Italy</b>           | 2.7                      | 29,675              | 33,569                                       | 7,016      | 1,162 | 3.5             | 16.6         | 36.3   |
| <b>France</b>          | 5.6                      | 36,819              | 38,387                                       | 8,560      | 2,477 | 6.5             | 28.9         | 68.4   |
| <b>Austria</b>         | 3.5                      | 8,355               | 8,177                                        | 1,954      | 323   | 4.0             | 16.5         | 37.9   |
| <b>Belgium ^</b>       | 3.6                      | 10,760              | 12,558                                       | 2,286      | 443   | 3.5             | 19.4         | 40.3   |
| <b>The Netherlands</b> | 2.4                      | 16,530              | 14,794                                       | 2,559      | 628   | 4.2             | 24.5         | 36.7   |
| <b>UK ^</b>            | 4.2                      | 61,791              | 50,513                                       | 9,294      | 2,718 | 5.4             | 29.2         | 44.8   |
| <b>Denmark</b>         | 1.6                      | 5,579               | 4,677                                        | 940        | 94    | 2.0             | 10.0         | 16.9   |
| <b>Sweden</b>          | 5.4                      | 9,299               | 8,277                                        | 2,160      | 732   | 8.8             | 33.9         | 78.3   |
| <b>Norway</b>          | 5.7                      | 4,829               | 4,066                                        | 1,212      | 246   | 6.1             | 20.3         | 51.5   |
| <b>Finland</b>         | 5.0                      | 5,339               | 4,166                                        | 904        | 336   | 8.1             | 37.2         | 60.3   |
| <b>Iceland</b>         | 5.3                      | 318                 | 172                                          | 40         | 17    | 9.9             | 42.4         | 60.2   |

\* Based on the 2009 ERA-EDTA report.

# Incident ESRD cases due to IgAN per million population (PMP) based on a 3-year period (2007, 2008, and 2009).

## Prevalent ESRD cases due to IgAN per million population (PMP) for 2009.

^ Patients younger than 20 years of age are not reported.

Data for France is based on the regions Alsace, Auvergne, Bourgogne, Bretagne, Champagne-Ardenne, Corse, Haute Normandie, Languedoc Roussillon, Limousin, Midi-Pyrénées, Pays de Loire, Picardie, Poitou-Charentes, Provence-Alpes-Côte d Azur, Rhône Alpes, and the overseas department of Reunion.

Data for Italy is based on the regions Abruzzi, Apulia, Basilicata, Calabria, Emilia-Romagna, Friuli-Venezia Giulia, Lombardy, Marche, Sardinia, Tuscany, Umbria, and Veneto.

Data for Spain is based on the regions Andalusia, Asturias, Basque country, Cantabria, Castile and Leon, Castile-La Mancha, Catalonia, Extremadura, Galicia and Valencian region.
