# Supplementary material for: Geographic Differences in Genetic Susceptibility to IgA Nephropathy: GWAS Replication Study and Geospatial Risk Analysis
Source: PLoS Genet. 2012 Jun 21;8(6):e1002765. doi: 10.1371/journal.pgen.1002765 (PMC3380840; doi:10.1371/journal.pgen.1002765)
Supplement: Table S2 — Power calculation. Study power for the replication cohort of 4,789 individuals (2,228 cases/2,561 controls) as a function of disease allele frequency and genotype relative risk. The power was calculated in reference to a protective allele; the range of allelic frequencies and effects was based on the results of the original GWAS. Assumptions include: disease prevalence of 1%, log-additive model, no heterogeneity, and alpha = 0.01 (Bonferroni-adjusted considering five independent loci tested). (PDF) [file pgen.1002765.s005.pdf]

**Supplemental Table 2. Power calculation.** Study power for the replication cohort of 4,789 individuals (2,228 cases / 2,561 controls) as a function of disease allele frequency and genotype relative risk. The power was calculated in reference to a protective allele; the range of allelic frequencies and effects was based on the results of the original GWAS. Assumptions include: disease prevalence of 1%, log-additive model, no heterogeneity, and alpha = 0.01 (Bonferroni-adjusted considering five independent loci tested).

| Disease Allele Frequency | Relative Risk (Additive Model) |      |       |       |
|--------------------------|--------------------------------|------|-------|-------|
|                          | 0.50                           | 0.60 | 0.70  | 0.80  |
| 0.10                     | 100%                           | 100% | 98.9% | 70.7% |
| 0.20                     | 100%                           | 100% | 100%  | 94.8% |
| 0.30                     | 100%                           | 100% | 100%  | 98.9% |
| 0.40                     | 100%                           | 100% | 100%  | 99.6% |
| 0.50                     | 100%                           | 100% | 100%  | 99.8% |
