# Supplementary material for: Geographic Differences in Genetic Susceptibility to IgA Nephropathy: GWAS Replication Study and Geospatial Risk Analysis
Source: PLoS Genet. 2012 Jun 21;8(6):e1002765. doi: 10.1371/journal.pgen.1002765 (PMC3380840; doi:10.1371/journal.pgen.1002765)
Supplement: Table S6 — All possible 1st order multiplicative interactions between the 7 SNPs with independent effects on disease risk. Statistical significance is assessed using a Bonferroni-corrected threshold, alpha 0.05/21 = 2.4×10−3. (PDF) [file pgen.1002765.s009.pdf]

**Supplemental Table 6. All possible 1<sup>st</sup> order multiplicative interactions between the 7 SNPs with independent effects on disease risk.**

Statistical significance is assessed using a Bonferroni-corrected threshold,  $\alpha 0.05/21=2.4 \times 10^{-3}$ .

**All cohorts: N = 10,755**

| <b>p-value<br/>beta</b> | <b>rs6677604 (A)</b> | <b>rs9275224 (A)</b> | <b>rs2856717 (T)</b> | <b>rs9275596 (C)</b> | <b>rs9357155 (A)</b> | <b>rs1883414 (T)</b> | <b>rs2412971 (A)</b>                       |
|-------------------------|----------------------|----------------------|----------------------|----------------------|----------------------|----------------------|--------------------------------------------|
| <b>rs6677604 (A)</b>    |                      | 0.80 (NS)            | 0.08 (NS)            | 0.13 (NS)            | 0.62 (NS)            | 0.89 (NS)            | <b><math>2.5 \times 10^{-4}</math> ***</b> |
| <b>rs9275224 (A)</b>    | 0.01                 |                      | 0.26 (NS)            | 0.27 (NS)            | 0.52 (NS)            | 0.40 (NS)            | 0.27 (NS)                                  |
| <b>rs2856717 (T)</b>    | 0.11                 | 0.06                 |                      | 0.36 (NS)            | 0.90 (NS)            | 0.01 (NS)            | 0.02 (NS)                                  |
| <b>rs9275596 (C)</b>    | 0.10                 | 0.06                 | 0.05                 |                      | 0.56 (NS)            | 0.01 (NS)            | 0.02 (NS)                                  |
| <b>rs9357155 (A)</b>    | 0.04                 | 0.04                 | 0.01                 | -0.04                |                      | 0.25 (NS)            | 0.09 (NS)                                  |
| <b>rs1883414 (T)</b>    | -0.01                | 0.04                 | 0.13                 | 0.14                 | 0.07                 |                      | 0.01 (NS)                                  |
| <b>rs2412971 (A)</b>    | <b>0.21</b>          | 0.04                 | 0.10                 | 0.11                 | 0.10                 | 0.12                 |                                            |

**European Cohorts: N=5,938**

| <b>p-value<br/>beta</b> | <b>rs6677604 (A)</b> | <b>rs9275224 (A)</b> | <b>rs2856717 (T)</b> | <b>rs9275596 (C)</b> | <b>rs9357155 (A)</b> | <b>rs1883414 (T)</b> | <b>rs2412971 (A)</b>                       |
|-------------------------|----------------------|----------------------|----------------------|----------------------|----------------------|----------------------|--------------------------------------------|
| <b>rs6677604 (A)</b>    |                      | 0.36 (NS)            | 0.16 (NS)            | 0.48 (NS)            | 0.55 (NS)            | 0.30 (NS)            | <b><math>1.4 \times 10^{-3}</math> ***</b> |
| <b>rs9275224 (A)</b>    | 0.06                 |                      | 0.77 (NS)            | 0.96 (NS)            | 0.74 (NS)            | 0.37 (NS)            | 0.10 (NS)                                  |
| <b>rs2856717 (T)</b>    | 0.10                 | 0.02                 |                      | 0.98 (NS)            | 0.98 (NS)            | 0.07 (NS)            | 0.16 (NS)                                  |
| <b>rs9275596 (C)</b>    | 0.05                 | 0.00                 | 0.00                 |                      | 0.59 (NS)            | 0.12 (NS)            | 0.39 (NS)                                  |
| <b>rs9357155 (A)</b>    | 0.06                 | 0.03                 | 0.00                 | -0.05                |                      | 0.19 (NS)            | 0.04 (NS)                                  |
| <b>rs1883414 (T)</b>    | -0.08                | 0.05                 | 0.11                 | 0.10                 | 0.12                 |                      | 0.06 (NS)                                  |
| <b>rs2412971 (A)</b>    | <b>0.22</b>          | 0.09                 | 0.08                 | 0.05                 | 0.17                 | 0.11                 |                                            |

**Asian Cohorts: N=4,723**

| <b>p-value<br/>beta</b> | <b>rs6677604 (A)</b> | <b>rs9275224 (A)</b> | <b>rs2856717 (T)</b> | <b>rs9275596 (C)</b> | <b>rs9357155 (A)</b> | <b>rs1883414 (T)</b> | <b>rs2412971 (A)</b> |
|-------------------------|----------------------|----------------------|----------------------|----------------------|----------------------|----------------------|----------------------|
| <b>rs6677604 (A)</b>    |                      | 0.15 (NS)            | 0.71 (NS)            | 0.96 (NS)            | 0.23 (NS)            | 0.72 (NS)            | <b>0.60 (NS)</b>     |
| <b>rs9275224 (A)</b>    | -0.20                |                      | 0.34 (NS)            | 0.31 (NS)            | 0.91 (NS)            | 0.58 (NS)            | 0.47 (NS)            |
| <b>rs2856717 (T)</b>    | -0.06                | 0.09                 |                      | 0.75 (NS)            | 0.78 (NS)            | 0.24 (NS)            | 0.54 (NS)            |
| <b>rs9275596 (C)</b>    | -0.01                | 0.10                 | 0.04                 |                      | 0.90 (NS)            | 0.07 (NS)            | 0.29 (NS)            |
| <b>rs9357155 (A)</b>    | -0.23                | 0.01                 | -0.03                | -0.01                |                      | 0.96 (NS)            | 0.61 (NS)            |
| <b>rs1883414 (T)</b>    | 0.06                 | -0.04                | 0.10                 | 0.16                 | 0.01                 |                      | 0.31 (NS)            |
| <b>rs2412971 (A)</b>    | <b>0.07</b>          | -0.05                | 0.05                 | 0.09                 | -0.04                | 0.08                 |                      |
