# Supplementary material for: Geographic Differences in Genetic Susceptibility to IgA Nephropathy: GWAS Replication Study and Geospatial Risk Analysis
Source: PLoS Genet. 2012 Jun 21;8(6):e1002765. doi: 10.1371/journal.pgen.1002765 (PMC3380840; doi:10.1371/journal.pgen.1002765)
Supplement: Table S9 — Asian, Oceanian, and American populations included in the geospatial risk analysis. The populations were grouped by their continental origin and sorted based on the median genetic risk score. (PDF) [file pgen.1002765.s012.pdf]

**Supplemental Table 9. Asian, Oceanian, and American populations included in the geospatial risk analysis.** The populations were grouped by their continental origin and sorted based on the median genetic risk score.

| Continental Group  | Country/Region | Population/Site | Sample Source | Sample Size | Longitude | Latitude | Median Standardized Risk Score |
|--------------------|----------------|-----------------|---------------|-------------|-----------|----------|--------------------------------|
| Central South Asia | Pakistan       | Sindhi          | HGDP          | 25          | 69.0      | 25.5     | -0.77                          |
| Central South Asia | Pakistan       | Balochi         | HGDP          | 25          | 66.5      | 30.5     | -0.60                          |
| Central South Asia | Pakistan       | Brahui          | HGDP          | 25          | 66.5      | 30.5     | -0.60                          |
| Central South Asia | India          | GIH             | HAPMAP3       | 88          | 71.2      | 22.3     | -0.56                          |
| Central South Asia | Pakistan       | Burusho         | HGDP          | 25          | 74.0      | 36.5     | -0.55                          |
| Central South Asia | Pakistan       | Makrani         | HGDP          | 25          | 64.0      | 26.0     | -0.51                          |
| Central South Asia | Pakistan       | Pathan          | HGDP          | 23          | 70.5      | 33.5     | -0.50                          |
| Central South Asia | Pakistan       | Kalash          | HGDP          | 25          | 71.5      | 36.0     | -0.31                          |
| Central South Asia | China          | Uygur           | HGDP          | 10          | 81.0      | 44.0     | -0.11                          |
| Central South Asia | Pakistan       | Hazara          | HGDP          | 24          | 70.0      | 33.5     | -0.06                          |
| East Asia          | China          | Tu              | HGDP          | 10          | 101.0     | 36.0     | -0.33                          |
| East Asia          | China          | Daur            | HGDP          | 9           | 124.0     | 48.5     | -0.06                          |
| East Asia          | China          | Mongola         | HGDP          | 10          | 111.0     | 45.0     | 0.06                           |
| East Asia          | China          | Yizu            | HGDP          | 10          | 103.0     | 28.0     | 0.30                           |
| East Asia          | China          | Han             | IgAN GWAS     | 900         | 116.4     | 39.9     | 0.50                           |
| East Asia          | China          | Dai             | HGDP          | 10          | 100.0     | 21.0     | 0.52                           |
| East Asia          | China          | Miaozu          | HGDP          | 10          | 109.0     | 28.0     | 0.54                           |
| East Asia          | China          | Xibo            | HGDP          | 9           | 81.5      | 43.5     | 0.57                           |
| East Asia          | Siberia        | Yakut           | HGDP          | 25          | 129.5     | 63.0     | 0.61                           |
| East Asia          | China          | Han             | Present Study | 266         | 116.4     | 39.9     | 0.62                           |
| East Asia          | China          | CHB             | HAPMAP3       | 81          | 116.4     | 39.9     | 0.62                           |
| East Asia          | Japan          | JPT             | HAPMAP3       | 86          | 139.7     | 35.7     | 0.62                           |
| East Asia          | China          | Han             | HGDP          | 44          | 114.0     | 37.5     | 0.64                           |
| East Asia          | China          | Hezhen          | HGDP          | 9           | 133.5     | 47.5     | 0.64                           |
| East Asia          | China          | Shanghai        | IgAN GWAS     | 711         | 121.5     | 31.2     | 0.73                           |
| East Asia          | Japan          | Niigata         | Present Study | 267         | 139.1     | 37.9     | 0.73                           |
| East Asia          | Japan          | Japanese        | HGDP          | 29          | 138.0     | 38.0     | 0.83                           |
| East Asia          | China          | She             | HGDP          | 10          | 119.0     | 27.0     | 0.88                           |
| East Asia          | Cambodia       | Cambodians      | HGDP          | 11          | 105.0     | 12.0     | 0.89                           |
| East Asia          | China          | Lahu            | HGDP          | 10          | 100.0     | 22.0     | 0.89                           |
| East Asia          | China          | Tujia           | HGDP          | 10          | 109.0     | 29.0     | 1.08                           |
| East Asia          | China          | Oroqen          | HGDP          | 10          | 126.5     | 50.5     | 1.26                           |
| East Asia          | China          | Naxi            | HGDP          | 9           | 100.0     | 26.0     | 1.58                           |
| Oceania            | New Guinea     | Papuan          | HGDP          | 17          | 143.0     | -4.0     | -0.38                          |
| Oceania            | Bougainville   | NAN-Melanesian  | HGDP          | 19          | 155.0     | -6.0     | 0.64                           |
| America            | USA            | MEX             | HAPMAP3       | 48          | -118.2    | 34.1     | 0.40                           |
| America            | Mexico         | Pima            | HGDP          | 25          | -108.0    | 29.0     | 0.57                           |
| America            | Colombia       | Colombians      | HGDP          | 13          | -68.0     | 3.0      | 0.57                           |
| America            | Mexico         | Maya            | HGDP          | 25          | -91.0     | 19.0     | 0.64                           |
| America            | Brazil         | Surui           | HGDP          | 21          | -62.0     | -11.0    | 0.64                           |
| America            | Brazil         | Karitiana       | HGDP          | 24          | -63.0     | -10.0    | 0.89                           |
