# Supplementary material for: Geographic Differences in Genetic Susceptibility to IgA Nephropathy: GWAS Replication Study and Geospatial Risk Analysis
Source: PLoS Genet. 2012 Jun 21;8(6):e1002765. doi: 10.1371/journal.pgen.1002765 (PMC3380840; doi:10.1371/journal.pgen.1002765)
Supplement: Table S11 — Prevalence and Incidence of ESRD due to IgAN in the US. Primary data obtained from the USRDS Annual Report, 2011. (PDF) [file pgen.1002765.s014.pdf]

**Supplemental Table 11. Prevalence and Incidence of ESRD due to IgAN in the US.** Primary data obtained from the USRDS Annual Report, 2011.

| Ethnicity           | Yearly Incidence (PMP) # | Population (1000s)* | USRDS Prevalence Data<br>(December 31, 2009) |            |       |                 |              |        |
|---------------------|--------------------------|---------------------|----------------------------------------------|------------|-------|-----------------|--------------|--------|
|                     |                          |                     | Prevalent Cases (Counts)                     |            |       | IgAN Prevalence |              |        |
|                     |                          |                     | ESRD                                         | Primary GN | IgAN  | % ESRD          | % Primary GN | PMP ## |
| US African-American | 1.5                      | 39,641              | 180,567                                      | 21,192     | 598   | 0.33            | 2.82         | 14.4   |
| US White-American   | 2.8                      | 244,298             | 347,420                                      | 52,164     | 6,660 | 1.92            | 12.77        | 26.4   |
| US Native-Americans | 5.5                      | 3,151               | 7,428                                        | 978        | 181   | 2.44            | 18.53        | 50.7   |
| US Asian-American   | 10.8                     | 14,014              | 30,285                                       | 6,357      | 1,522 | 5.03            | 23.94        | 93.2   |

\* Based on the 2009 US Census Data  
# Incident ESRD cases due to IgAN per million population (PMP) based on a 5-year period (2005-2009).  
## Prevalent ESRD cases due to IgAN per million population (PMP) for 2009.
